# Supplementary material
Source: publisher site journal article supplement (https://www.spandidos-publications.com/5243/downloadSupplementary)

Figure S1. Effect of NONHSAG028908.3 overexpression on cell proliferation in normal cells. (A) The mRNA expression of NONHSAG028908.3 was verified in transfected NONHSAG028908.3-overexpressing NCM460 cells. (B) Cell growth was detected via MTT assay. Results are presented as the mean  $\pm$  SD. \*\*\*P<0.001. OD, optical density.

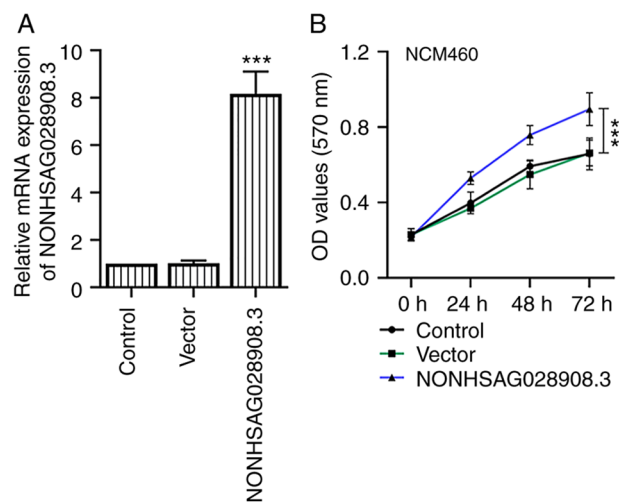

Figure S2. Correlation of NONHSAG028908.3/miR-34a-5p/ALDOA expression in CRC cells or tissues. NONHSAG028908.3 expression was negatively correlated with miR-34a-5p expression in CRC cell lines (CCLE dataset, n=56). MiR-34a-5p expression exhibited an inverse correlation with ALDOA expression in the same 56 CRC cell lines. NONHSAG028908.3 expression was positively correlated with ALDOA expression in clinical CRC tissues (TCGA dataset, n=105). miR-34a-5p, microRNA-34a-5p; ALDOA, aldolase, fructose-bisphosphate A; CRC, colorectal cancer; CCLE, Cancer Cell Line Encyclopedia; TCGA, The Cancer Genome Atlas.

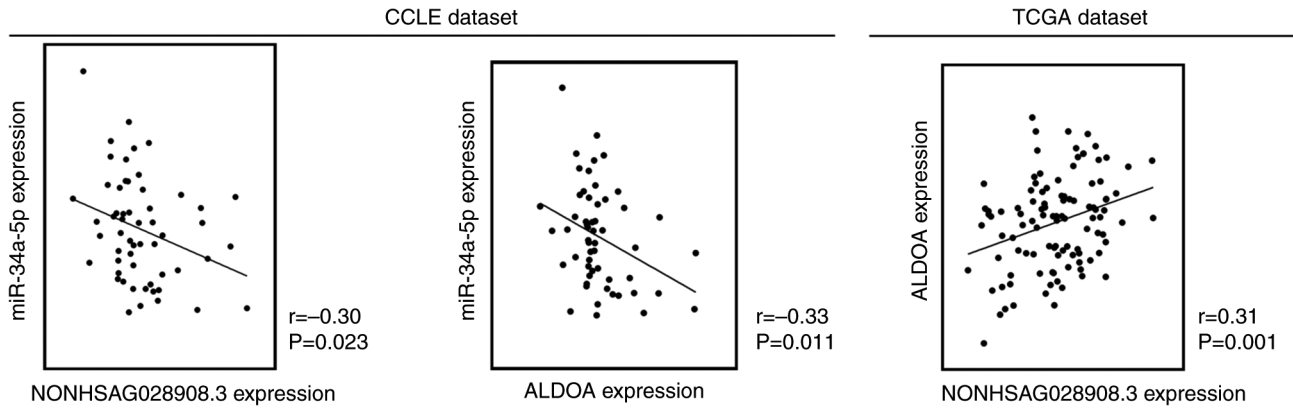

Supplement: Supplementary file 1 [file downloadSupplementary]
